# Supplementary material for: A coumarin-based “off–on” fluorescent probe for highly selective detection of hydrogen sulfide and imaging in living cells
Source: Royal Society of Chemistry journal article supplement (doi:10.1039/d1ay00097g), 2021-01-01
Supplement: d1ay00097g1.pdf [file d1ay00097g1.pdf]

Electronic supplementary Information for

**A coumarin-base “off-on” fluorescent probe for highly selective  
detection of hydrogen sulfide and imaging in living cells**

Luying Ou,<sup>a</sup> Rui Guo,<sup>a</sup> and Weiyang Lin<sup>a,b,\*</sup>

*<sup>a</sup> Guangxi Key Laboratory of Electrochemical Energy Materials, Institute of Optical Materials and Chemical Biology, School of Chemistry and Chemical Engineering, Guangxi University, Nanning, Guangxi 530004, P. R. China*

*<sup>b</sup> Institute of Fluorescent Probes for Biological Imaging, School of Chemistry and Chemical Engineering, School of Materials Science and Engineering, University of Jinan, Shandong 250022, P. R. China*

Email: [weiyanglin2013@163.com](mailto:weiyanglin2013@163.com)

**Table of contents**

|                                | Page  |
|--------------------------------|-------|
| Figure S1.....                 | S3    |
| Figure S2.....                 | S3    |
| Figure S3.....                 | S4    |
| Figure S4.....                 | S4    |
| Spectral characterization..... | S5-S8 |

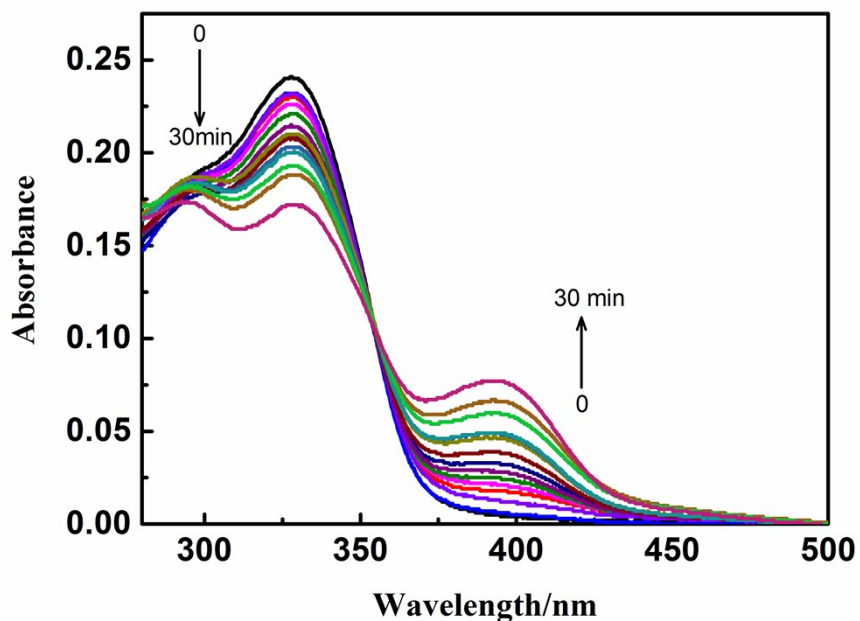

**Figure S1** The absorption spectral changes of CMHS (10  $\mu\text{M}$ ) with time upon addition of  $\text{H}_2\text{S}$  (20 $\mu\text{M}$ ) in PBS buffer (pH 7.4, 10%  $\text{CH}_3\text{CN}$ ).

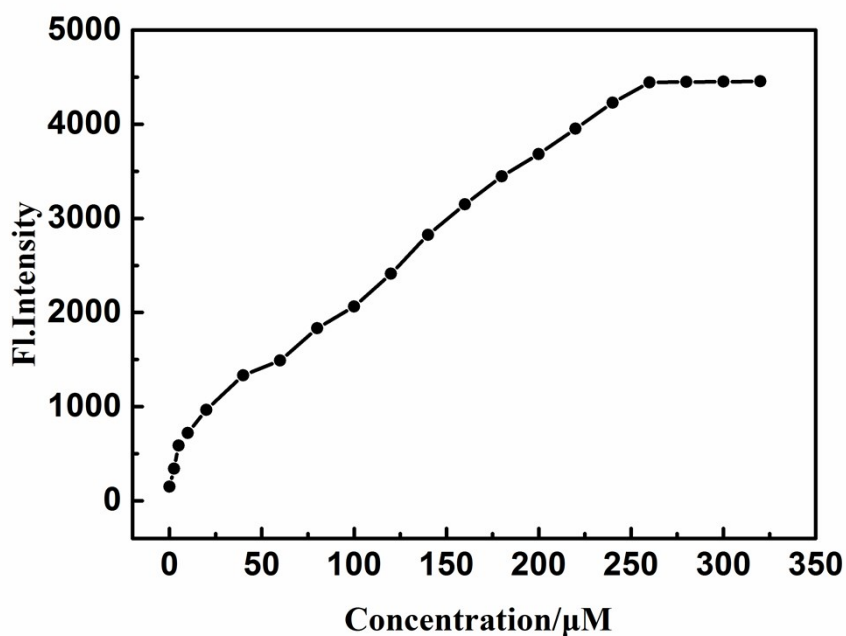

**Figure S2** The fluorescent intensity changing with  $\text{H}_2\text{S}$  to CMHS ratio. 10  $\mu\text{M}$  of CMHS titrated with increasing concentrations of  $\text{H}_2\text{S}$ .

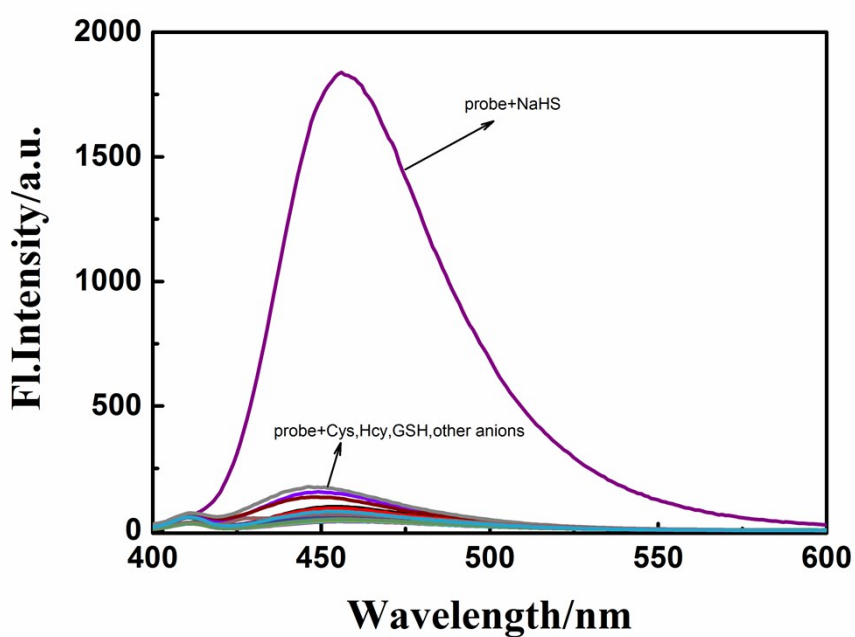

**Figure S3** The fluorescence spectra changes of probe CHMS (10  $\mu\text{M}$ ) in the presence of various analytes (50  $\mu\text{M}$ ) ( $\text{F}^-$ ,  $\text{Cl}^-$ ,  $\text{Br}^-$ ,  $\text{I}^-$ ,  $\text{HCO}_3^-$ ,  $\text{NO}_3^-$ ,  $\text{HSO}_4^-$ ,  $\text{SO}_3^{2-}$ ,  $\text{SO}_4^{2-}$ ,  $\text{CN}^-$ ,  $\text{S}_2\text{O}_3^{2-}$ ,  $\text{AcO}^-$ ,  $\text{H}_2\text{O}_2$ ,  $\text{ClO}^-$ , GSH, Hcy, Cys, NaHS) in PBS buffer (pH 7.4, 10%  $\text{CH}_3\text{CN}$ ).

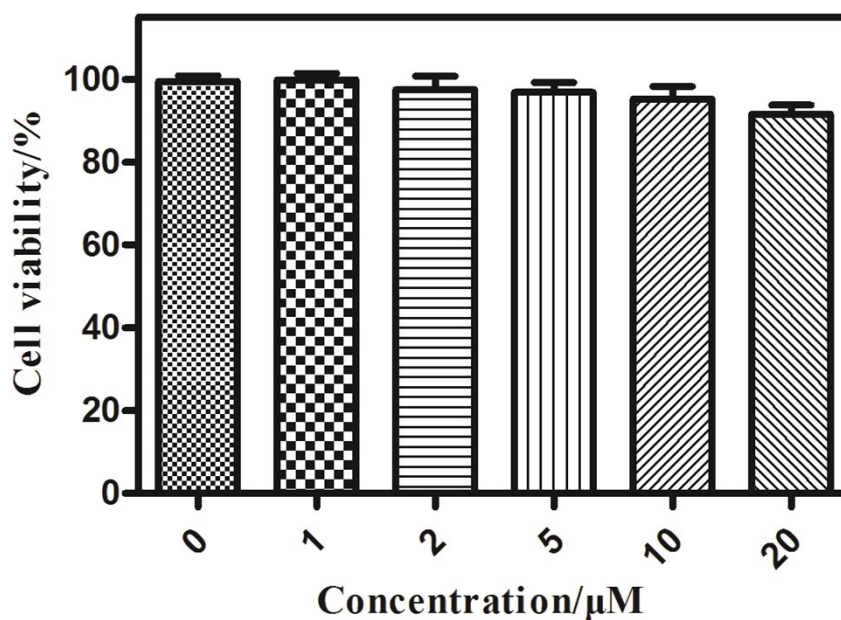

**Figure S4** MTT assay for estimating cell viability(%) of HeLa cells. The concentration of probe CMHS were used: 0 $\mu\text{M}$ , 1 $\mu\text{M}$ , 2 $\mu\text{M}$ , 5 $\mu\text{M}$ , 10 $\mu\text{M}$ , 20 $\mu\text{M}$ .

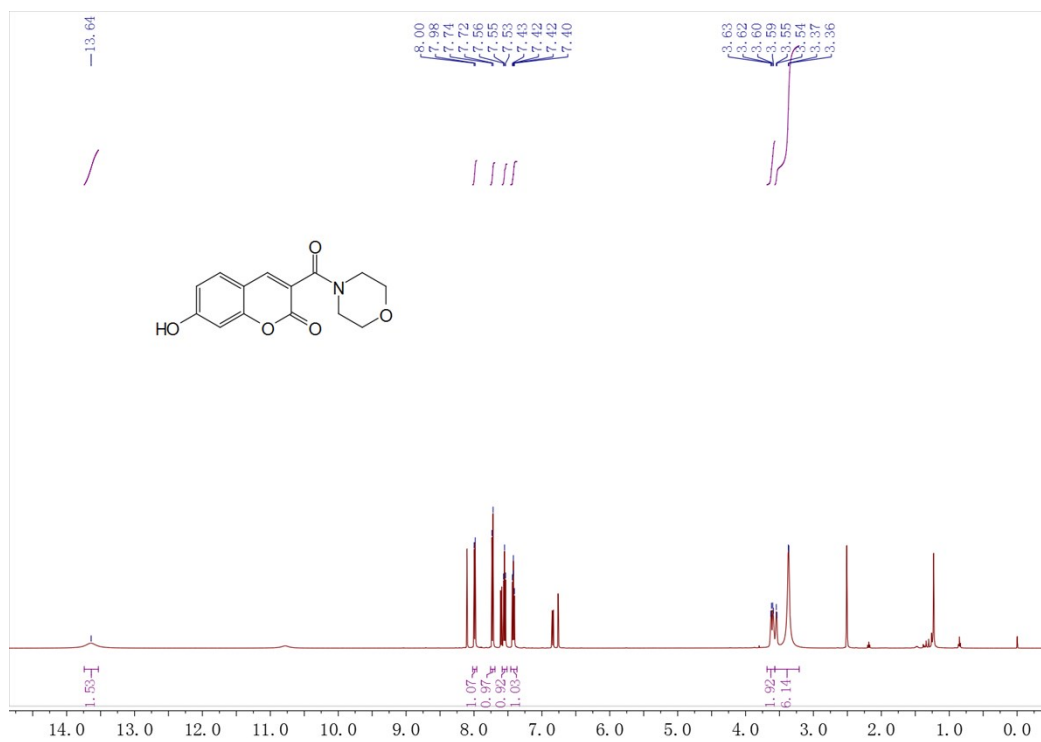

**Fig. S5**  $^{13}\text{C}$  NMR spectrum of compound **CMHS-OH** in  $\text{DMSO-}d_6$

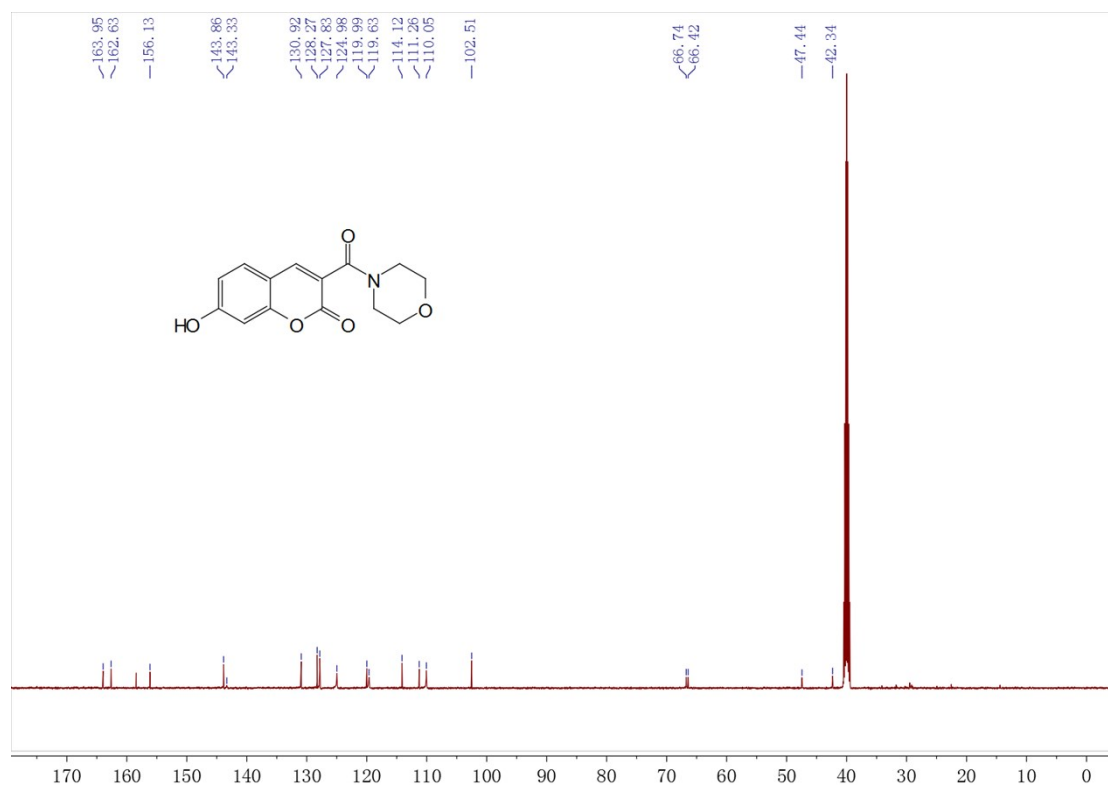

**Fig. S6** <sup>13</sup>C NMR spectrum of compound CMHS-OH in DMSO-*d*<sub>6</sub>

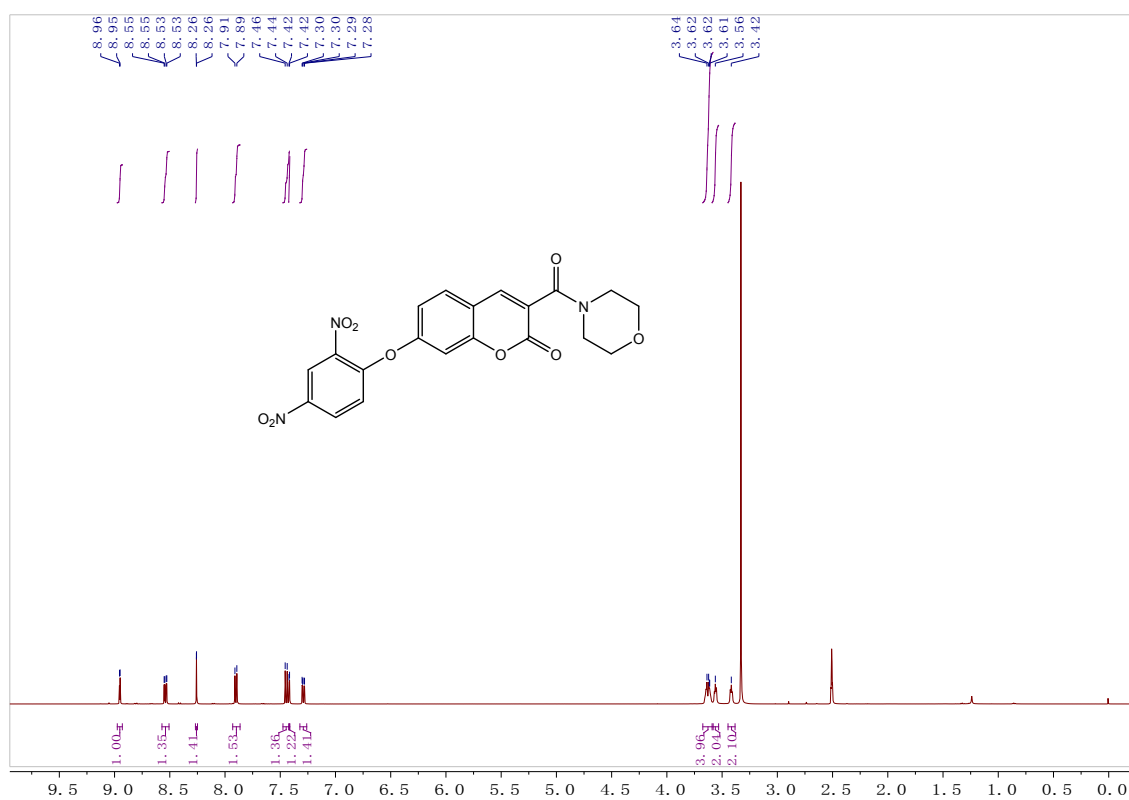

**Figure S7** <sup>1</sup>H-NMR (DMSO-*d*<sub>6</sub>) spectrum of CMHS.

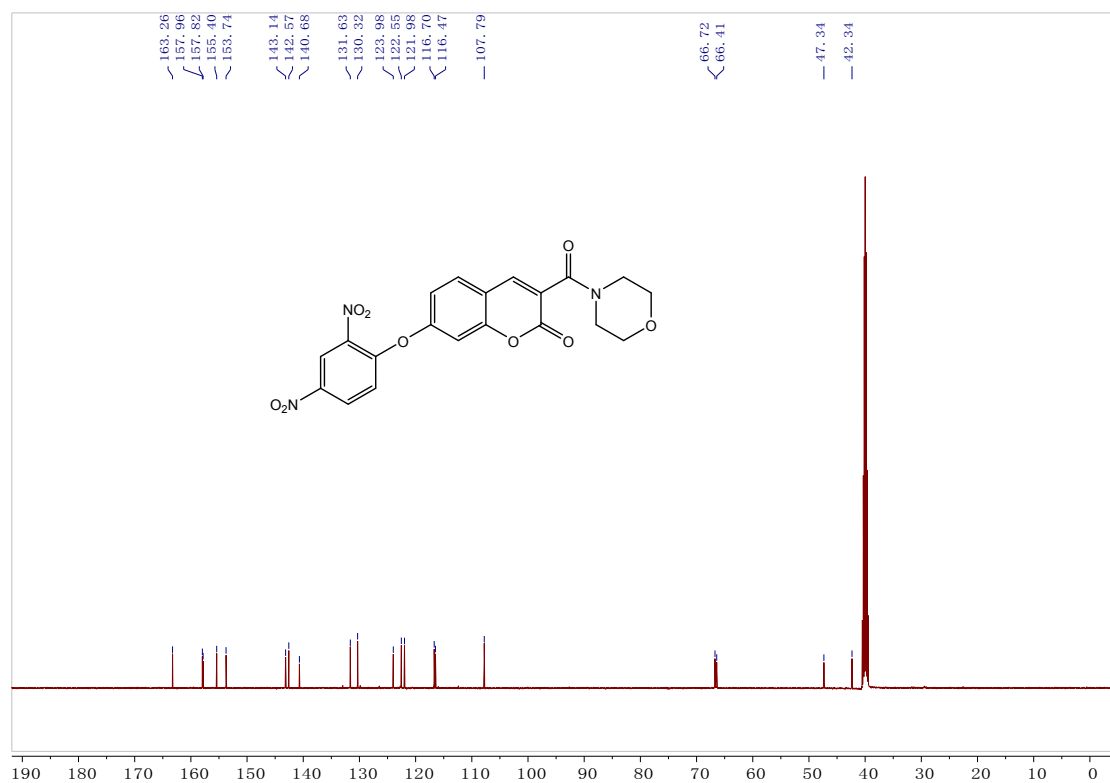

**Figure S8**  $^{13}\text{C}$ -NMR (DMSO- $d_6$ ) spectrum of CMHS.

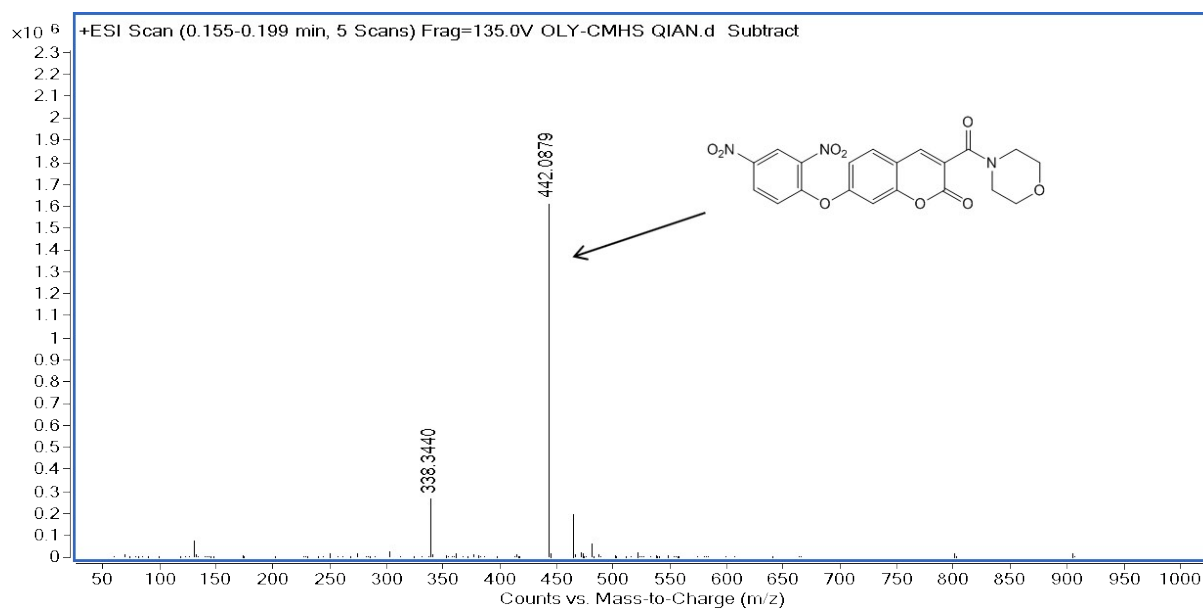

**Figure S9** HRMS spectrum of compound CMHS. Compound CMHS:  $\text{C}_{20}\text{H}_{15}\text{N}_3\text{O}_9$ ; HRMS  $m/z$  calculated for  $\text{C}_{20}\text{H}_{15}\text{N}_3\text{O}_9$ ,  $[\text{M} + \text{H}]^+$ : 442.0881. Found 442.0879.

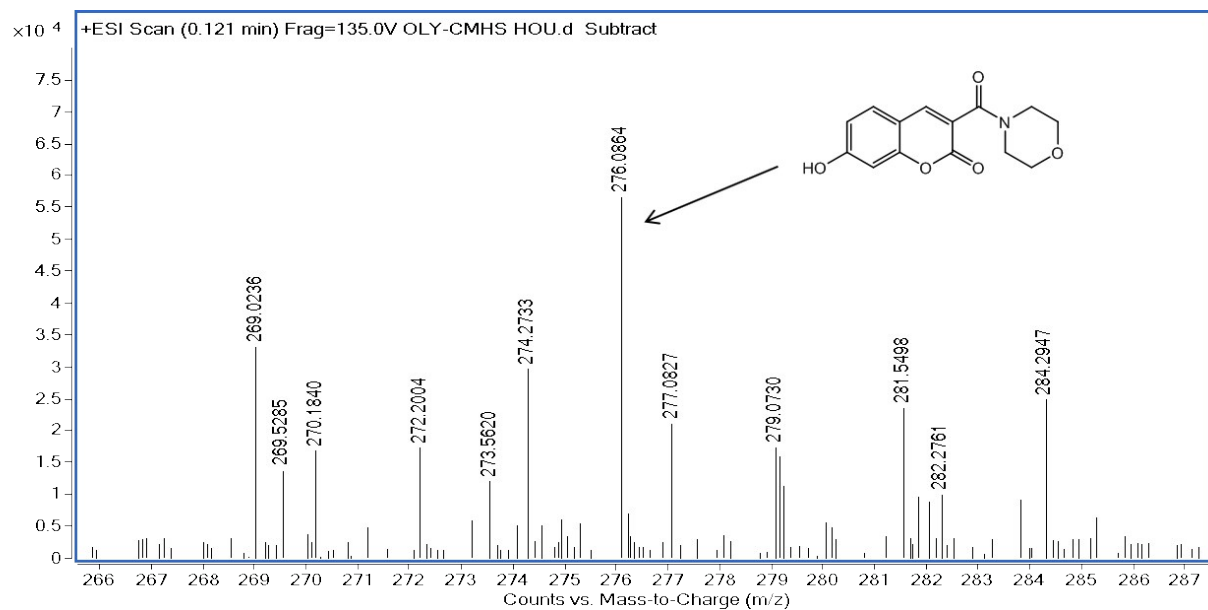

**Figure S10** HRMS spectrum of compound **CMHS-OH**. Compound **CMHS-OH**: $C_{14}H_{13}NO_5$ ; HRMS  $m/z$  calculated for  $C_{14}H_{13}NO_5$ ,  $[M + H]^+$ :276.0866. Found 276.0864.
